# Supplementary material for: Effects of daidzein and genistein on markers of cardiovascular disease risk among women with impaired glucose regulation: a double-blind, randomized, placebo-controlled trial
Source: Royal Society of Chemistry journal article supplement (doi:10.1039/d1fo00712b), 2021-01-01
Supplement: d1fo00712b1.pdf [file d1fo00712b1.pdf]

## Supporting Information

**Supporting Information Table S1. Baseline characteristics of the missing and the remaining participants**

|                          | Placebo ( <i>n</i> = 54)   |                               | Daidzein ( <i>n</i> = 55)  |                               | Genistein ( <i>n</i> = 56) |                               |
|--------------------------|----------------------------|-------------------------------|----------------------------|-------------------------------|----------------------------|-------------------------------|
|                          | Missing<br>( <i>n</i> = 7) | Remaining<br>( <i>n</i> = 47) | Missing<br>( <i>n</i> = 5) | Remaining<br>( <i>n</i> = 50) | Missing<br>( <i>n</i> = 2) | Remaining<br>( <i>n</i> = 54) |
| Age, y                   | 56.4±15.6                  | 56.3±10.5                     | 57.6±16.2                  | 56.2±9.3                      | 56.0±4.2                   | 57.1±9.8                      |
| Weight, Kg               | 55.2±7.7                   | 58.0±9.8                      | 60.1±14.1                  | 59.3±7.7                      | 65.3±1.8                   | 58.3±8.9                      |
| BMI, kg/m <sup>2</sup>   | 22.7±2.6                   | 23.8±3.6                      | 24.4±5.7                   | 24.3±3.0                      | 24.4±2.8                   | 24.1±3.5                      |
| SBP, mmHg                | 116±23                     | 122±15                        | 120±13                     | 121±15                        | 122±9                      | 116±14                        |
| DBP, mmHg                | 73±16                      | 76±8                          | 68±4                       | 75±8                          | 78±4                       | 73±9                          |
| Body fat, %              | 32.5±3.4                   | 31.4±6.8                      | 28.8±15.2                  | 32.3±6.1                      | 33.7±7.9                   | 32.8±6.2                      |
| Waist Circumference, cm  | 84.4±5.7                   | 82.4±8.5                      | 83.6±8.0                   | 83.6±7.0                      | 85.5±7.8                   | 81.6±8.8                      |
| Total energy, kcal/d     | 1969±585                   | 1923±534                      | 1734±760                   | 1880±546                      | 1923±611                   | 1868±514                      |
| Total protein, g         | 96.3±53.4                  | 88.1±29.1                     | 75.4±36.6                  | 89.2±32.7                     | 92.2±34.6                  | 86.2±29.7                     |
| Fat, g                   | 74.5±23.2                  | 73.9±28.7                     | 48.8±20.9                  | 68.3±26.4                     | 82.4±20.6                  | 67.6±22.7                     |
| Kcal from fat, %         | 34.4±7.3                   | 34.3±7.4                      | 27.0±9.8                   | 32.5±6.9                      | 39.0±2.7                   | 32.7±6.9                      |
| Soy protein, g           | 2.4±1.3                    | 3.4±4.7                       | 1.6±1.3                    | 3.0±3.8                       | 2.6±0.3                    | 2.8±2.4                       |
| Total isoflavones, mg/d  | 11.5±7.0                   | 15.7±20.4                     | 7.76±6.9                   | 13.9±15.7                     | 11.2±2.8                   | 12.6±9.7                      |
| Fasting glucose, mmol/l  | 5.96±0.89                  | 5.85±0.98                     | 5.59±0.50                  | 5.75±0.82                     | 6.04±0.32                  | 5.91±0.94                     |
| 120-min postload, mmol/l | 11.59±4.50                 | 10.92±3.61                    | 12.83±3.89                 | 11.08±3.53                    | 14.37±1.21                 | 10.61±3.34                    |
| HbA <sub>1C</sub> , %    | 6.24±1.00                  | 6.44±1.08                     | 6.02±0.43                  | 6.49±0.57                     | 7.00±0.42                  | 6.33±0.78                     |

All of the values were presented in Mean ± SD ; No significant difference was observed (t-test) between each set of groups, including in the Placebo group, the Daidzein group and the Genistein group.

**Supporting Information Table S2. Dietary intakes and physical activities at baseline and follow-up in 165 study participants through three arms <sup>a</sup>**

|                                                      | Placebo (n = 54) | Daidzein (n = 55) | Genistein (n = 56) | P value |
|------------------------------------------------------|------------------|-------------------|--------------------|---------|
| Baseline dietary intakes <sup>b</sup>                |                  |                   |                    |         |
| Total energy ( kJ/d )                                | 8059 ± 2220      | 7799 ± 2344       | 7815 ± 2136        | 0.79    |
| Total protein ( g )                                  | 89.2 ± 32.6      | 88.0 ± 32.9       | 86.4 ± 29.5        | 0.90    |
| Fat ( g )                                            | 74.0 ± 27.8      | 66.6 ± 26.4       | 68.1 ± 22.6        | 0.29    |
| Kcal from fat ( % )                                  | 34.3 ± 7.3       | 32.0 ± 7.2        | 32.9 ± 6.8         | 0.25    |
| Soy protein ( g )                                    | 3.3 ± 4.5        | 2.9 ± 3.6         | 2.8 ± 2.3          | 0.76    |
| Total isoflavones (mg/d)                             | 15.1 ± 19.2      | 13.3 ± 15.2       | 12.5 ± 9.5         | 0.65    |
| Daidzein ( mg/d )                                    | 6.3 ± 8.0        | 5.5 ± 6.1         | 5.2 ± 4.0          | 0.61    |
| Genistein ( mg/d )                                   | 8.6 ± 10.7       | 7.5 ± 8.5         | 7.2 ± 5.5          | 0.65    |
| Glycitein (mg/d)                                     | 0.9 ± 1.6        | 0.7 ± 1.0         | 0.7 ± 0.6          | 0.76    |
| Dietary intake at follow-up, on average <sup>c</sup> |                  |                   |                    |         |
| Total energy ( kJ/d )                                | 6499 ± 1287      | 6461 ± 1630       | 6660 ± 1801        | 0.79    |
| Total protein ( g )                                  | 71.5 ± 17.7      | 75. ± 22.8        | 73.5 ± 24.1        | 0.67    |
| Fat ( g )                                            | 57.7 ± 15.6      | 57.1 ± 17.0       | 56.6 ± 17.8        | 0.95    |
| Kcal from fat ( % )                                  | 33.3 ± 5.1       | 32.7 ± 7.5        | 31.7 ± 5.0         | 0.40    |
| Soy protein ( g )                                    | 2.4 ± 3.0        | 3.2 ± 3.0         | 3.1 ± 3.7          | 0.46    |
| Total isoflavones (mg/d)                             | 12.0 ± 13.4      | 13.2 ± 12.2       | 13.1 ± 13.0        | 0.88    |
| Daidzein ( mg/d )                                    | 4.9 ± 5.2        | 5.2 ± 4.9         | 5.5 ± 5.3          | 0.88    |
| Genistein ( mg/d )                                   | 6.9 ± 7.5        | 7.6 ± 7.1         | 7.4 ± 7.9          | 0.82    |
| Glycitein ( mg/d )                                   | 0.6 ± 0.9        | 0.7 ± 0.8         | 0.8 ± 0.9          | 0.53    |
| Energy expenditure of PA ( MET-h/d <sup>d</sup> )    |                  |                   |                    |         |
| Total PA at baseline                                 | 32.2 ± 7.5       | 31.7 ± 4.6        | 31.4 ± 5.9         | 0.72    |
| Total PA at follow-up <sup>e</sup>                   | 29.1 ± 4.3       | 29.8 ± 3.9        | 28.9 ± 4.0         | 0.10    |
| Changes of follow-up and baseline                    |                  |                   |                    |         |
| Total energy ( kJ/d )                                | -1446 ± 2499     | -1350 ± 2470      | -1157 ± 2307       | 0.82    |
| Total protein ( g )                                  | -13.7 ± 32.7     | -13.5 ± 34.4      | -13.3 ± 32.7       | 0.99    |
| Fat ( g )                                            | -15.1 ± 28.8     | -9.3 ± 31.4       | -11.3 ± 25.5       | 0.59    |
| Soy protein ( g )                                    | -0.7 ± 4.3       | -0.4 ± 4.1        | -0.3 ± 3.6         | 0.34    |
| Total isoflavones (mg/d)                             | -2.6 ± 17.8      | -0.2 ± 16.4       | -1.2 ± 14.3        | 0.50    |
| Daidzein ( mg/d )                                    | -1.1 ± 7.0       | -0.3 ± 6.6        | -0.4 ± 5.8         | 0.51    |
| Genistein ( mg/d )                                   | -1.4 ± 9.6       | -0.05 ± 9.3       | -0.7 ± 8.2         | 0.49    |
| Glycitein (mg/d)                                     | -0.3 ± 1.7       | -0.01 ± 1.2       | -0.05 ± 1.0        | 0.45    |
| Total PA ( MET-h/d <sup>d</sup> )                    | -3.9 ± 5.8       | -2.5 ± 4.6        | -1.6 ± 4.4         | 0.055   |

<sup>a</sup> All of the values were presented in Mean ± SD; PA, physical activity; METs, average metabolic equivalent tasks ; ANOVA analysis with a post hoc comparison by a Bonferroni test .

<sup>b</sup> Dietary intake on baseline was derived from Food frequency questionnaire ( FFQ ).

<sup>c</sup> Dietary intake at follow-up did not include intervention supplements; the average data was

derived from three 24-hour diet records on 12 week and 24 week.

<sup>d</sup> Energy expenditure of PA was defined as occupational, leisure-time and household-chores activity, and evaluated by metabolic equivalent hours per day (MET-h/d).

<sup>e</sup> The average data was derived from three PA records on 12 week and 24 week.

**Supporting Information Table S3.** 24h urinary isoflavone excretion (mmol/24h) during the 6-mo intervention according to treatment groups in 165 women by intention-to-treat analysis <sup>a</sup>

|       |           | Placebo ( <i>n</i> = 46) |              | Daizein ( <i>n</i> = 52) |              | Genistein ( <i>n</i> = 50) |              | <i>P</i> value |
|-------|-----------|--------------------------|--------------|--------------------------|--------------|----------------------------|--------------|----------------|
| Total | ISO       | 37.1                     | (28.5,74.5)  | 99.2 <sup>c</sup>        | (89.9, 187)  | 65.4 <sup>c</sup>          | (56.8, 129)  | 0.000          |
|       | Daidzein  | 11.7 <sup>c</sup>        | (10.1, 29.3) | 43.5                     | (36.6, 88.2) | 12.0 <sup>c</sup>          | (10.4, 31.5) | 0.000          |
|       | Genistein | 4.6 <sup>c</sup>         | ( 3.7, 9.6)  | 5.4 <sup>c</sup>         | (3.2, 12.3)  | 16.6                       | (15.6, 58.2) | 0.000          |
|       | Equol     | 1.8 <sup>c</sup>         | ( 1.5, 7.7)  | 4.6                      | (3.3, 25.2)  | 2.8                        | (2.34, 13.5) | 0.013          |

<sup>a</sup> All values presented in this table are geometric mean and 95% CI( ); The number of the participants whose urinary isoflavone excretion was measured is the number of participants who collected the 24h urine at 12 weeks; ANOVA analysis with a post hoc comparison by a Bonferroni test. Means in a row with superscripts without a common letter differ,  $P < 0.05$ .

<sup>b</sup> ISO, isoflavones.

**Supporting Information Table S4. 24-week percentage changes (%) for some of the indices of cardiovascular risk by subgrouping of baseline lipids <sup>a</sup>**

|                                        | Placebo      | Daidzein      | Genistein                 | P value            |
|----------------------------------------|--------------|---------------|---------------------------|--------------------|
| <b>normal lipids</b>                   | <i>n</i> =15 | <i>n</i> = 12 | <i>n</i> = 10             |                    |
| <i>TC</i>                              | 2.8 ± 13.0   | 1.6 ± 9.0     | 20.9 ± 14 <sup>b</sup>    | 0.001              |
| <i>TG</i>                              | 22.0 ± 56.8  | 19.3 ± 41.1   | 21.2 ± 62.2               | 0.99               |
| <i>HDL-C</i>                           | 0.3 ± 20.5   | 0.3 ± 16.9    | 8.7 ± 18.1                | 0.49               |
| <i>LDL-C</i>                           | 4.7 ± 20.6   | -0.6 ± 13.7   | 24.6 ± 22.1 <sup>c</sup>  | 0.01               |
| <i>Lp(a)</i>                           | 0.4 ± 22.0   | -0.2 ± 24.2   | 51.0 ± 87.0               | 0.39 <sup>d</sup>  |
| <i>hs-CRP</i>                          | -17.3 ± 52.4 | 6.8 ± 87.0    | -25.4 ± 66.6              | 0.48               |
| <i>UA</i>                              | -0.9 ± 19.4  | -7.2 ± 17.0   | -9.2 ± 16.4               | 0.48               |
| <b>marginal-dyslipidemia and above</b> | <i>n</i> =39 | <i>n</i> =43  | <i>n</i> = 46             |                    |
| <i>TC</i>                              | 2.8 ± 46.6   | -1.2 ± 12.6   | -5.3 ± 11.8               | 0.44 <sup>d</sup>  |
| <i>TG</i>                              | -0.3 ± 39.5  | -1.0 ± 37.6   | -6.5 ± 31.0               | 0.68               |
| <i>HDL_C</i>                           | 4.3 ± 20.5   | 1.7 ± 14.9    | 0.7 ± 13.5                | 0.59               |
| <i>LDL_C</i>                           | -0.3 ± 25.9  | -1.0 ± 23.0   | -3.1 ± 14.9               | 0.82               |
| <i>Lp(a)</i>                           | 4.8 ± 50.2   | 12.2 ± 37.8   | 6.4 ± 31.2                | 0.27 <sup>d</sup>  |
| <i>hs-CRP</i>                          | 23.9 ± 88.0  | -1.3 ± 71.7   | -16.7 ± 54.6 <sup>c</sup> | 0.038 <sup>d</sup> |
| <i>UA</i>                              | -0.8 ± 21.8  | 5.2 ± 21.7    | 2.7 ± 19.6                | 0.42               |
| <b>Moderate-dyslipidemia</b>           | <i>n</i> =22 | <i>n</i> =24  | <i>n</i> =30              |                    |
| <i>TC</i>                              | 7.4 ± 61.7   | 1.2 ± 12.2    | -7.2 ± 13.4               | 0.19 <sup>d</sup>  |
| <i>TG</i>                              | 0.1 ± 42.5   | -0.4 ± 36.9   | -11.4 ± 31.4              | 0.43               |
| <i>HDL-C</i>                           | 9.2 ± 24.9   | 3.9 ± 14.9    | 3.5 ± 13.6                | 0.48               |
| <i>LDL-C</i>                           | 2.4 ± 33.0   | 1.7 ± 24.5    | -4.8 ± 16.7               | 0.51               |
| <i>Lp(a)</i>                           | 4.7 ± 25.3   | 13.3 ± 43.4   | 7.7 ± 34.5                | 0.71               |
| <i>hs-CRP</i>                          | 13.1 ± 71.3  | -25.5 ± 36.6  | -13.8 ± 50.3              | 0.74               |
| <i>UA</i>                              | 0.7 ± 26.1   | 5.5 ± 16.1    | 1.7 ± 21.8                | 0.72               |

<sup>a</sup> All of the values presented in this table were means ± SD except that geometric means were used for which outcomes were abnormal distribution: Lp(a) in the normal lipids status subgroup; TC, Lp(a) and Hs-CRP in the marginal-dyslipidemia and above status subgroup, and TC in the moderated-dyslipidemia status subgroup; ANOVA analysis with a post hoc comparison by a Bonferroni test was used except for the values marked “d” which used Kruskal-Wallis H test of nonparametric test because of abnormal distribution; TC, total cholesterol; TG, triglyceride; HDL-C, high density lipoprotein cholesterol; LDL-C, low density lipoprotein cholesterol, Lp(a), lipoprotein a, hs-CRP, high sensitive C-creative protein; UA, uric acid; the definitions of different levels of dyslipidemia are based on the standard as below: normal lipids contains TC<5.20mmol/L, TG<1.70mmol/L, LDL-C<3.40mmol/L and HDL-C>1.0mmol/L; marginal

dyslipidemia contains at least one of lipid indices can reach these levels:  $5.20 \leq TC < 6.20 \text{ mmol/L}$ ,  $1.70 \leq TG < 2.30 \text{ mmol/L}$ ,  $3.40 \leq LDL-C < 4.10 \text{ mmol/L}$ , and  $HDL-C < 1.0 \text{ mmol/L}$ ; moderate dyslipidemia contains at least one of lipid indices can reach these levels:  $TC \geq 6.2 \text{ mmol/L}$ ,  $TG \geq 2.3 \text{ mmol/L}$ ,  $LDL-C \geq 4.10 \text{ mmol/L}$ , and  $HDL-C < 1.0 \text{ mmol/L}$ .

<sup>b</sup> Compared with placebo and daidzein group,  $p < 0.01$ .

<sup>c</sup> Compared with placebo and daidzein group,  $p < 0.05$ .

<sup>d</sup> Kruskal-Wallis H test of nonparametric test for abnormal distribution.

**Supporting Information Table S5. 24-week percentage changes (%) in some of the indices of cardiovascular risk by equol production status in**

**Daidzein group <sup>a</sup>**

|               | Equol nonproducers (n = 26) | Equol producers (n = 27) | P value <sup>b</sup> |
|---------------|-----------------------------|--------------------------|----------------------|
| <i>TC</i>     | 0.54 ± 13.1                 | -0.9 ± 11.3              | 0.91                 |
| <i>TG</i>     | 6.7 ± 42.6                  | -1.7 ± 36.5              | 0.89                 |
| <i>HDL-C</i>  | -0.7 ± 17.2                 | 3.2 ± 13.7               | 0.36                 |
| <i>LDL-C</i>  | -0.4 ± 26.2                 | -1.7 ± 16.5              | 0.83                 |
| <i>Lp(a)</i>  | 13.4 ± 34.4                 | 7.3 ± 37.3               | 0.54                 |
| <i>hs-CRP</i> | -17.6 ± 64.9                | 19.2 ± 82.2              | 0.08                 |
| <i>UA</i>     | 7.2 ± 21.8                  | -2.2 ± 20.8              | 0.12                 |

<sup>a</sup> All of the values presented in this table are unadjusted and were means ± SD; The definition of equol-producer is based on the standard of Frank: equol status was determined most dependably by overnight urine applying as cutoff the ratio of Equol / Daidzein  $\geq 0.018$  ( $\log_{10}$  Equol / Daidzein = -1.75) with a DE threshold of  $\geq 2$  nmol/mg creatinine; TC, total cholesterol; TG, triglyceride; HDL-C, high density lipoprotein cholesterol; LDL-C, low density lipoprotein cholesterol, Lp(a), lipoprotein a, hs-CRP, high sensitive C-creative protein; UA, uric acid.

<sup>b</sup> p values derived from T-test.

**Supporting Information Table S6. 24-week percentage changes (%) for some of the indices of cardiovascular risk by subgrouping of menopausal status <sup>a</sup>**

|                      | Placebo       | Daidzein      | Genistein                 | <i>P</i> value     |
|----------------------|---------------|---------------|---------------------------|--------------------|
| <b>Postmenopause</b> | <i>n</i> = 41 | <i>n</i> = 39 | <i>n</i> = 43             |                    |
| <i>TC</i>            | -1.8 ± 44.9   | -2.1 ± 11.9   | -0.6 ± 17.2               | 0.65 <sup>b</sup>  |
| <i>TG</i>            | 5.2 ± 40.1    | 5.8 ± 38.6    | -2.5 ± 41.9               | 0.34 <sup>b</sup>  |
| <i>HDL-C</i>         | 3.0 ± 22.3    | 0.5 ± 15.5    | 1.3 ± 12.4                | 0.81               |
| <i>LDL-C</i>         | -1.6 ± 22.8   | -4.5 ± 18.8   | 2.5 ± 21.0                | 0.32               |
| <i>Lp(a)</i>         | 2.7 ± 48.5    | 8.7 ± 38.0    | 18.1 ± 49.6               | 0.15 <sup>b</sup>  |
| <i>hs-CRP</i>        | 19.1 ± 86.2   | 12.4 ± 81.5   | -21.6 ± 50.9 <sup>c</sup> | 0.022 <sup>b</sup> |
| <i>UA</i>            | -1.1 ± 23.2   | 2.7 ± 19.7    | 2.0 ± 19.7                | 0.68               |
| <b>Pre-menopause</b> | <i>n</i> = 13 | <i>n</i> = 16 | <i>n</i> = 13             |                    |
| <i>TC</i>            | 6.1 ± 18.1    | 3.1 ± 11.4    | -0.8 ± 10.6               | 0.44               |
| <i>TG</i>            | 8.3 ± 61.4    | -2.4 ± 40.2   | 1.4 ± 29.2                | 0.82               |
| <i>HDL-C</i>         | 3.9 ± 13.2    | 3.5 ± 14.8    | 4.8 ± 20.4                | 0.98               |
| <i>LDL-C</i>         | 9.5 ± 28.4    | 7.7 ± 24.7    | -0.2 ± 13.0               | 0.52               |
| <i>Lp(a)</i>         | 6.3 ± 26.6    | 11.5 ± 29.6   | 2.1 ± 43.3                | 0.75               |
| <i>hs-CRP</i>        | -8.7 ± 62.0   | -28.6 ± 43.6  | -7.0 ± 72.9               | 0.55               |
| <i>UA</i>            | 20.8 ± 22.2   | 24.9 ± 87.0   | 3.7 ± 35.4                | 0.71               |

<sup>a</sup> All of the values presented in this table were original and unadjusted means±SD except that geometric means were used for TC, TG, Lp(a) and Hs-CRP in the post-menopause status subgroup which were abnormal distribution.. ANOVA analysis with a post hoc comparison by a Bonferroni test was used for HDL-C, LDL-C and UA in the postmenopausal participants and all markers in pre-menopausal participants; TC, total cholesterol; TG, triglyceride; HDL-C, high density lipoprotein cholesterol; LDL-C, low density lipoprotein cholesterol, Lp(a), lipoprotein a, Hs-CRP, high sensitive C-creative protein; UA, uric acid.

<sup>b</sup> Kruskal-Wallis H test of nonparametric test for abnormal distribution.

<sup>c</sup> Compared with placebo group, *p*<0.05.
